# Supplementary material for: Wet-chemical nitrogen-doping of graphene nanoplatelets as electrocatalysts for the oxygen reduction reaction
Source: Royal Society of Chemistry journal article supplement (doi:10.1039/c4ta07035f), 2015-01-01
Supplement: c4ta07035f1.pdf [file c4ta07035f1.pdf]

**Electronic Supplementary Information (ESI) for:**

**Wet-Chemical Nitrogen-Doping of Graphene Nanoplatelets as  
Electrocatalysts for Oxygen Reduction Reaction**

**Dong Wook Chang,<sup>a†</sup> Hyun-Jung-Choi,<sup>b†</sup> Jong-Beom Baek<sup>\*b</sup>**

*<sup>a</sup> Department of Industrial Chemistry, Pukyong National University, Pusan 608-739, South  
Korea.*

*<sup>b</sup> School of Energy and Chemical Engineering/Low-Dimensional Carbon Materials Center,  
Ulsan National University of Science and Technology (UNIST),  
100, Banyeon, Ulsan 689-798, South Korea.  
E-mail: jbbak@unist.ac.kr*

<sup>†</sup> These authors contributed equally.

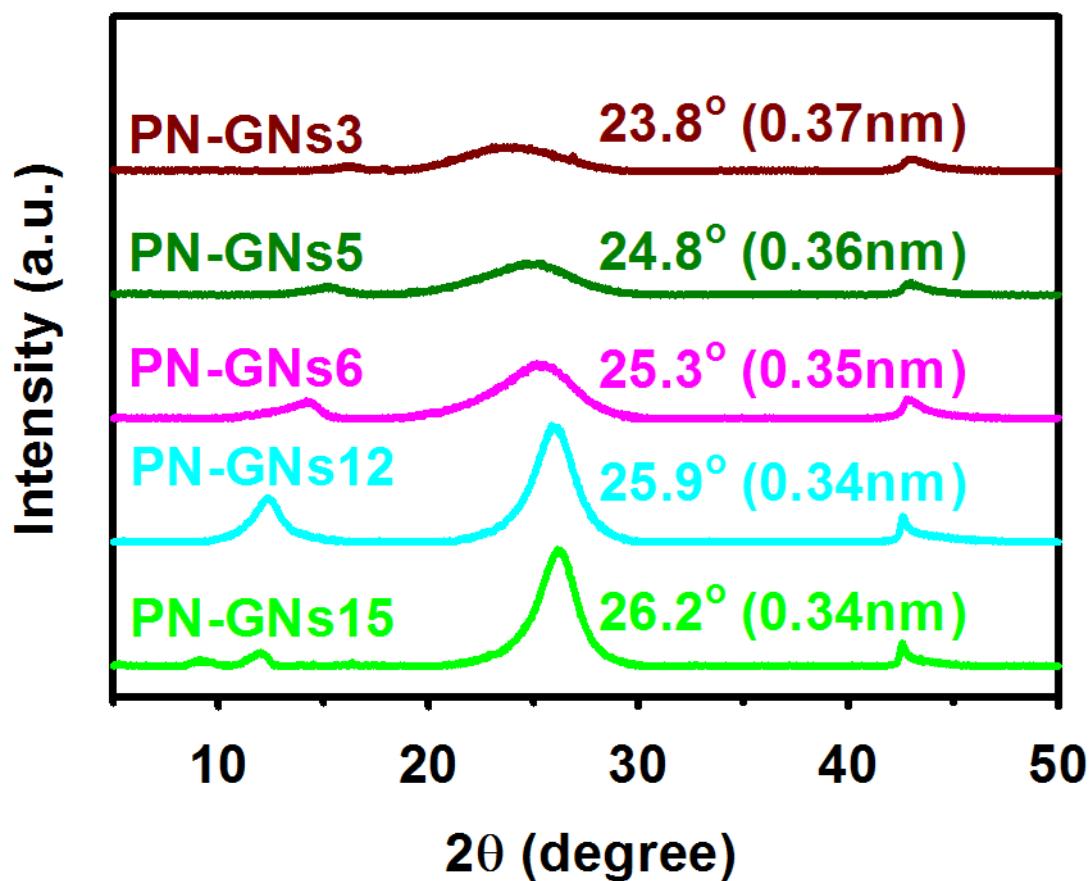

**Figure S1.** Magnified XRD diffraction patterns from the rectangle area in Figure 2d with the numbers of *d*-spacing in nanometer (nm) of PN-GNs3, PN-GNs5, PN-GNs6, PN-GNs12 and PN-GNs15.

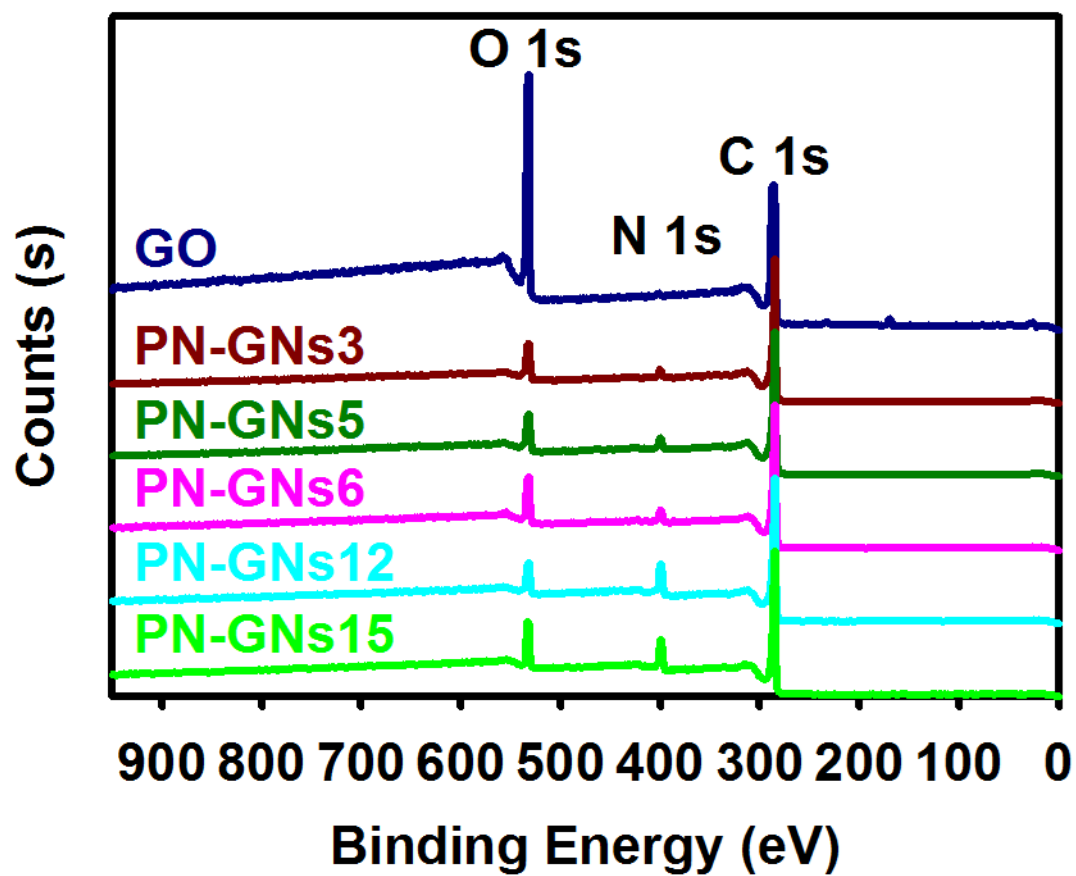

**Figure S2.** XPS survey spectra of GO, PN-GNs3, PN-GNs5, PN-GNs6, PN-GNs12 and PN-GNs15.

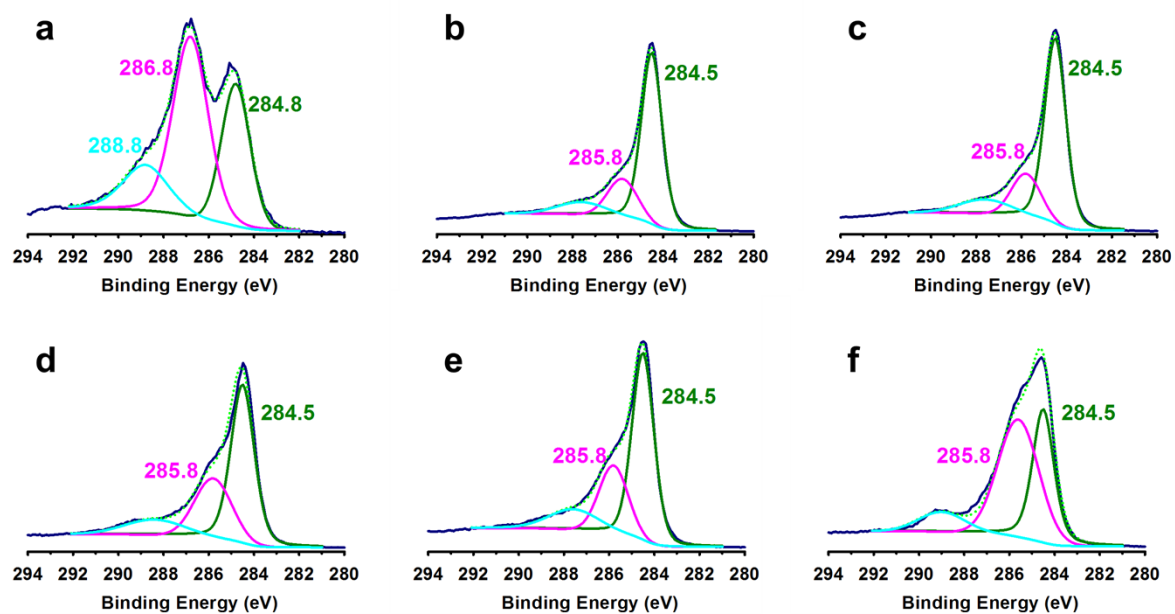

**Figure S3.** High-resolution XPS spectra of C 1s peaks: (a) GO; (b) PN-GNs3; (c) PN-GNs5; (d) PN-GNs6; (e) PN-GNs12; (f) PN-GNs15.

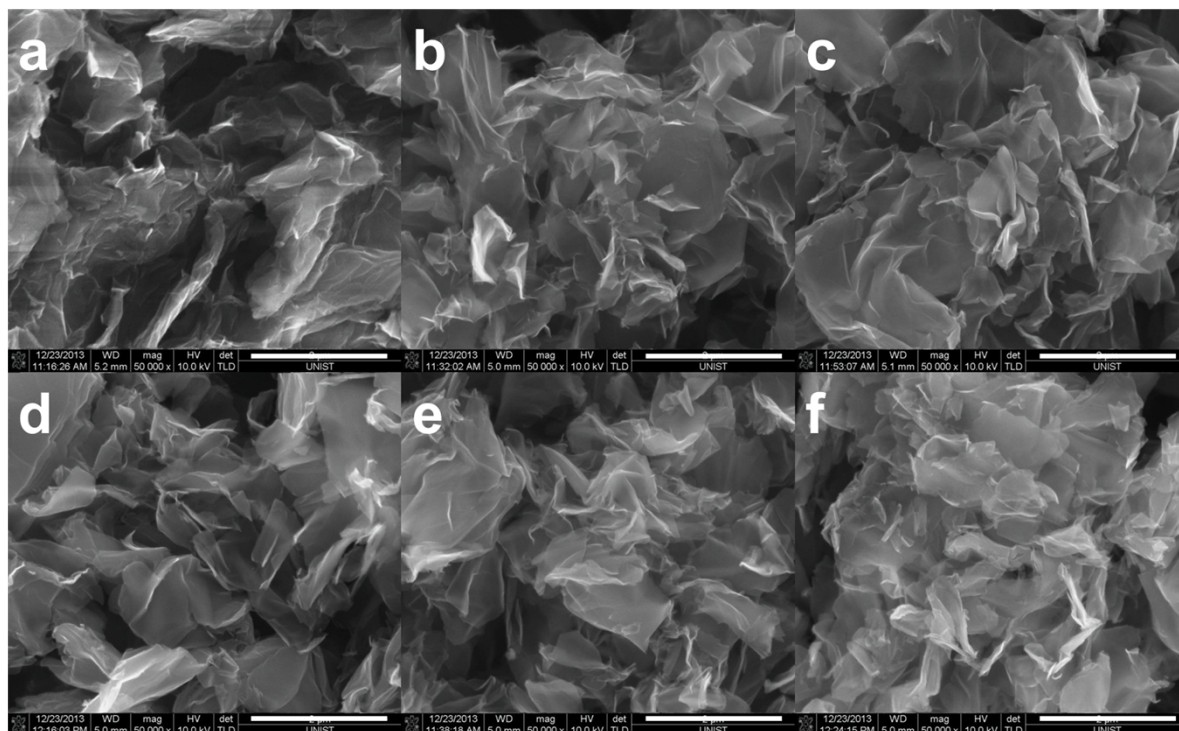

**Figure S4.** SEM images: (a) GO; (b) PN-GNs3; (c) PN-GNs5; (d) PN-GNs6; (e) PN-GNs12; (f) PN-GNs15. Scale bars are 2 μm.

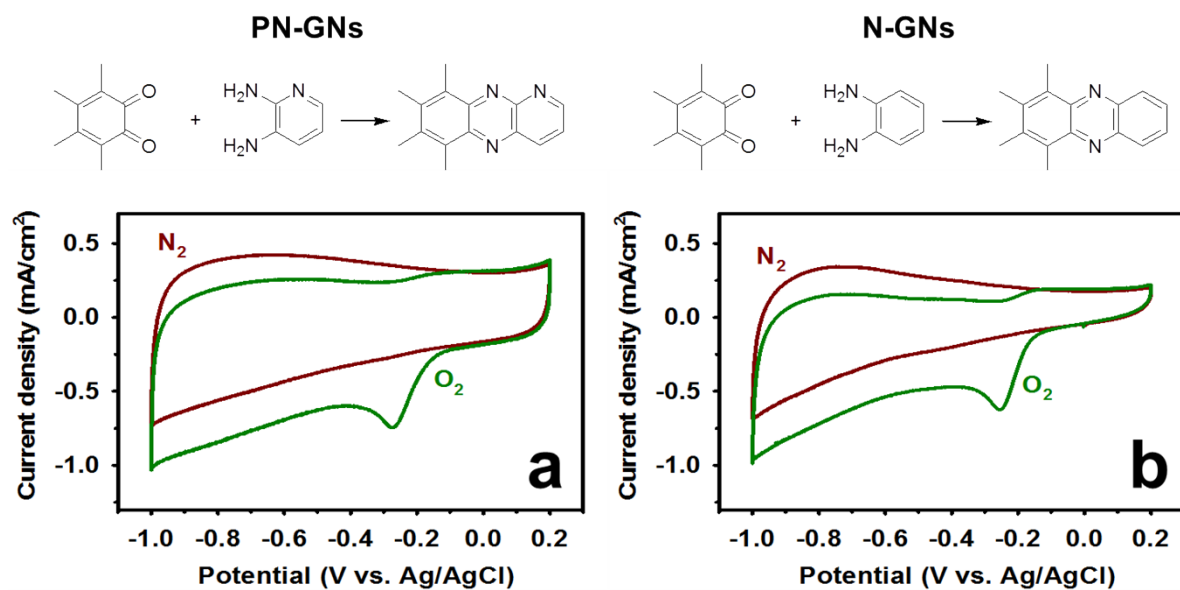

**Figure S5.** Reaction scheme and cyclic voltammograms (CV) of samples on glassy carbon (GC) electrodes in  $N_2$ - and  $O_2$ - saturated 0.1 M aqueous KOH solution at a scan rate of 10  $mV s^{-1}$ : (a) PN-GNs6; (b) N-GNs.

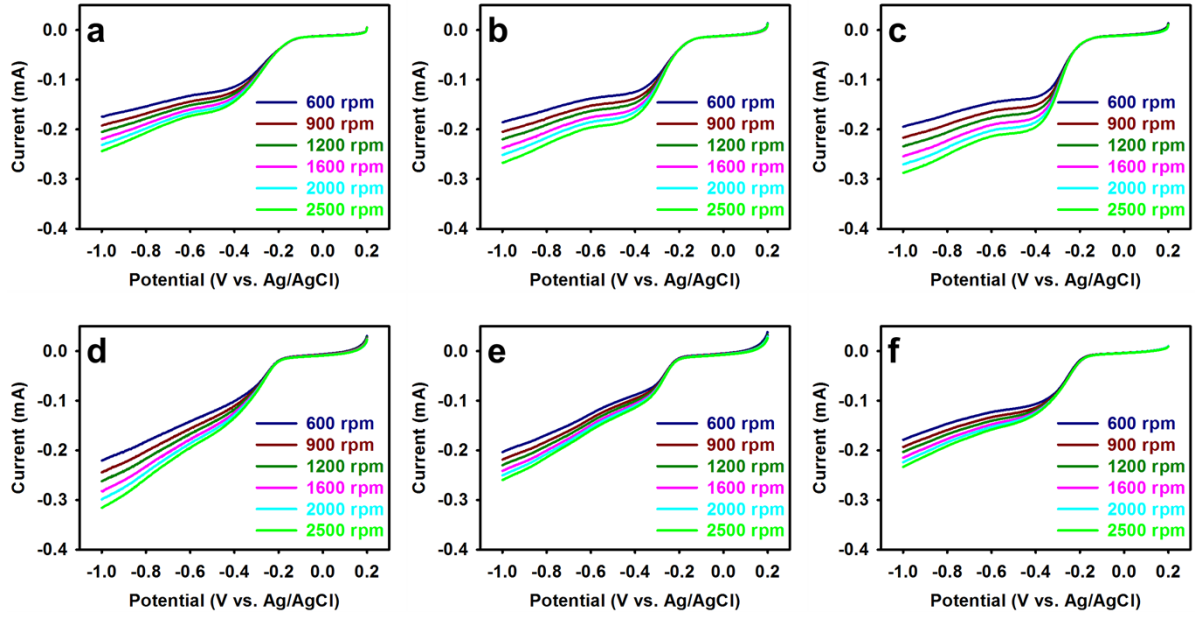

**Figure S6.** RDE voltammograms in  $O_2$ - saturated 0.1 M aqueous KOH solution with a scan rate of  $10 \text{ mVs}^{-1}$  at different rotating rates of 600, 900, 1200, 1600, 2000 and 2500 rpm: (a) PN-GNs3; (b) PN-GNs5; (c) PN-GNs6; (d) PN-GNs12; (e) PN-GNs15; (f) N-GNs.

### Calculation of electron transferred number (n)

The kinetic analysis for ORR was conducted according to Koutecky-Levich plots:

$$\frac{1}{j} = \frac{1}{j_k} + \frac{1}{B\omega^{0.5}} \quad (1)$$

where  $j_k$  is the kinetic current and  $B$  is Levich slope which is given by:

$$B = 0.2nF(D_{O_2})^{2/3} \nu^{-1/6} C_{O_2} \quad (2)$$

The constant 0.2 is generally adopted when the rotation speed is expressed in rpm.  $n$  is the number of electrons transferred for the reduction of one  $O_2$  molecule,  $F$  is the Faraday constant ( $F = 96485 \text{ C/mol}$ ),  $D_{O_2}$  is the diffusion coefficient of  $O_2$  ( $D_{O_2} = 1.9 \times 10^{-5} \text{ cm}^2 \text{ s}^{-1}$ ),  $\nu$

is the kinematics viscosity for KOH ( $\nu = 0.01 \text{ cm}^2 \text{ s}^{-1}$ ) and  $C_{\text{O}_2}$  is concentration of  $\text{O}_2$  in the solution ( $C_{\text{O}_2} = 1.2 \times 10^{-6} \text{ mol cm}^{-3}$ ).

According to equations (1) and (2), the number of electrons transferred ( $n$ ) can be obtained from the slope of Koutecky-Levich plot of  $i^{-1}$  vs.  $\omega^{-1/2}$ .

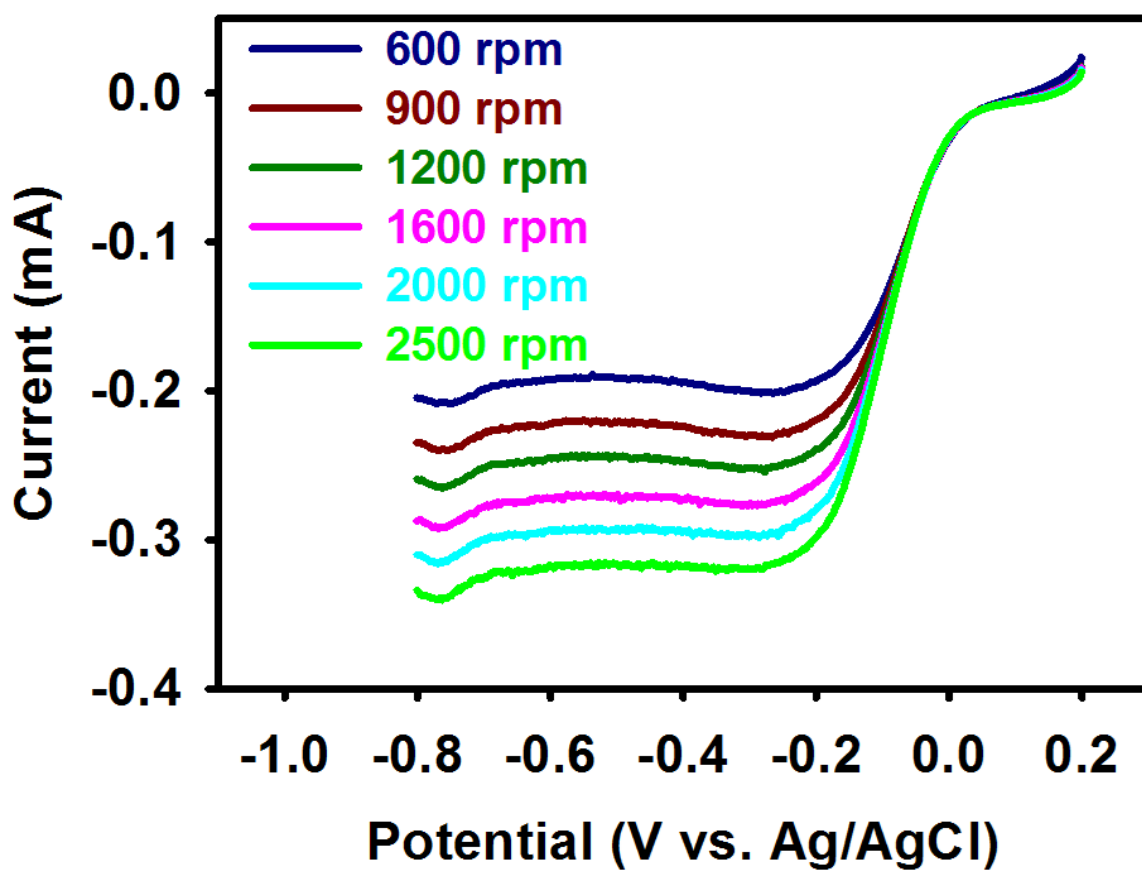

**Figure S7.** RDE voltammograms of Pt/C in  $\text{O}_2$ - saturated 0.1 M aqueous KOH solution with a scan rate of  $10 \text{ mVs}^{-1}$  at different rotating rates of 600, 900, 1200, 1600, 2000 and 2500 rpm.



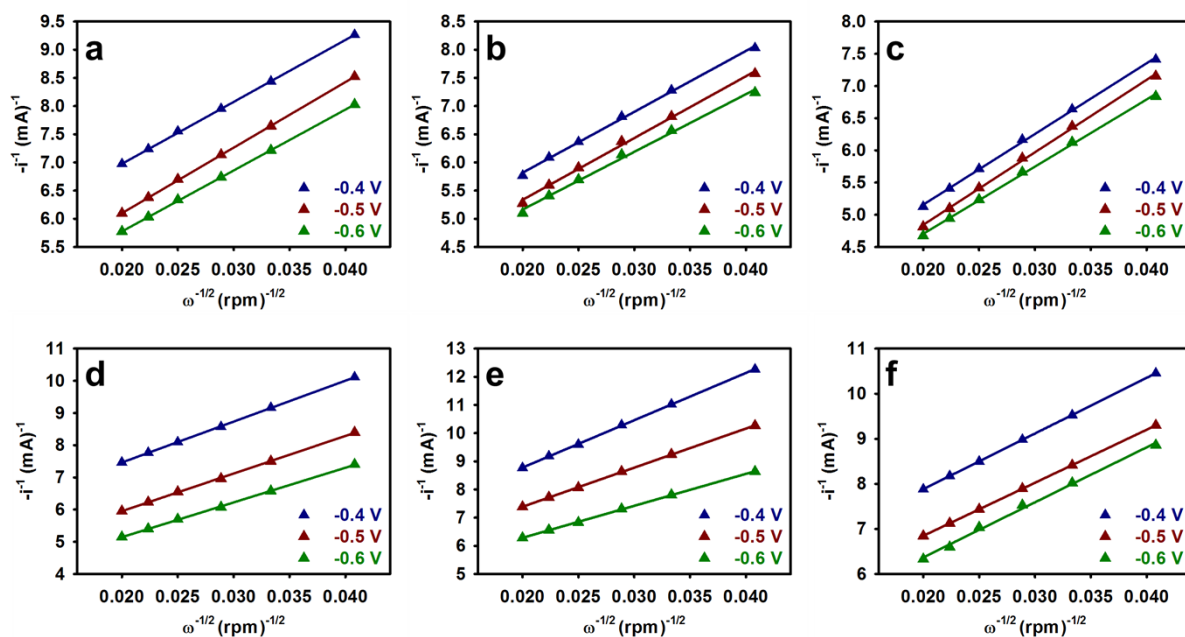

**Figure S8.** Koutechy-Levich plots derived from RDE measurements at different electrode potentials (blue line: -0.4 V, brown line: -0.5 V and green line: -0.6 V): (a) PN-GNs3; (b) PN-GNs5; (c) PN-GNs6; (d) PN-GNs12; (e) PN-GNs15; (f) N-GNs.

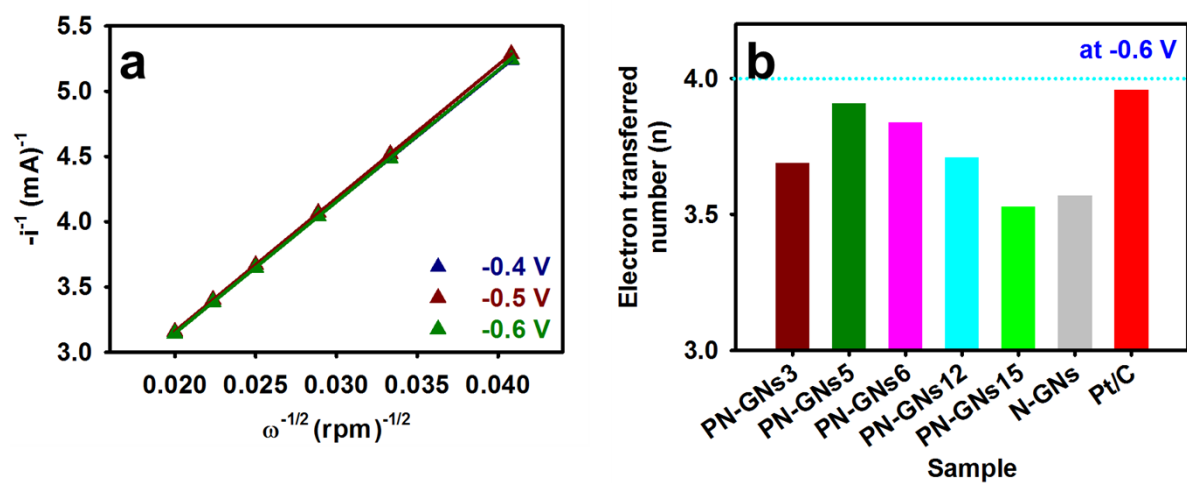

**Figure S9.** (a) Koutechy-Levich plots derived from RDE measurements of Pt/C at different electrode potentials (blue line: -0.4 V, brown line: -0.5 V and green line: -0.6 V); (b) electron transferred number ( $n$ ) of all samples at -0.6 V.

**Table S1.** Elemental analyses of graphite, GO, PN-GNs3, PN-GNs5, PN-GNs6, PN-GNs12, PN-GNs15 and N-GNs

| <b>Materials</b> | <b>C</b> | <b>O</b>         | <b>H</b> | <b>N</b>         | <b>Sum</b> | <b>C/O</b> | <b>C/N</b>   |
|------------------|----------|------------------|----------|------------------|------------|------------|--------------|
| <b>Graphite</b>  | 98.74    | BDL <sup>a</sup> | 0.11     | BDL <sup>a</sup> | 98.86      | $\infty^b$ | $\infty^b$   |
| <b>GO</b>        | 52.21    | 43.34            | 2.02     | BDL <sup>a</sup> | 97.57      | 1.61       | $\infty^b$   |
| <b>PN-GNs3</b>   | 75.12    | 17.69            | 1.69     | 3.27             | 97.77      | 5.66       | 26.72        |
| <b>PN-GNs5</b>   | 74.33    | 17.12            | 1.71     | 4.82             | 97.98      | 5.79       | 17.99        |
| <b>PN-GNs6</b>   | 72.89    | 15.63            | 1.93     | <b>6.49</b>      | 96.94      | 6.22       | <b>13.10</b> |
| <b>PN-GNs12</b>  | 70.18    | 13.38            | 2.02     | 11.64            | 97.22      | 6.99       | 7.03         |
| <b>PN-GNs15</b>  | 68.19    | 12.31            | 2.09     | 15.28            | 97.87      | 7.39       | 5.21         |
| <b>N-GNs</b>     | 79.01    | 10.49            | 1.62     | <b>6.45</b>      | 97.57      | 10.04      | <b>14.29</b> |

<sup>a</sup> BDL = Below detection limit

<sup>b</sup>  $\infty$  = Unlimited

**Table S2.** Capacitance (F/g) of samples on glassy carbon (GC) electrodes in N<sub>2</sub>-and O<sub>2</sub>-saturated 0.1 M aqueous KOH solution at a scan rate of 10 mV s<sup>-1</sup>

| <b>Sample</b>   | <b>Capacitance (F/g) in O<sub>2</sub></b> | <b>Capacitance (F/g) in N<sub>2</sub></b> |
|-----------------|-------------------------------------------|-------------------------------------------|
| <b>PN-GNs3</b>  | 130.1                                     | 120.2                                     |
| <b>PN-GNs5</b>  | 132.5                                     | 120.6                                     |
| <b>PN-GNs6</b>  | 139.7                                     | 122.5                                     |
| <b>PN-GNs12</b> | 129.4                                     | 118.6                                     |
| <b>PN-GNs15</b> | 108.5                                     | 104.8                                     |
| <b>N-GNs</b>    | 97.3                                      | 81.4                                      |
| <b>Pt/C</b>     | 88.8                                      | 82.3                                      |

**Table S3.** Onset potentials and limiting diffusion current at -0.6 V of all samples on a rotating disk electrode at a rotation speed of 1600 rpm and a scan rate of 10 mV s<sup>-1</sup>

|               | PNGNs3 | PNGNs5 | PNGNs6 | PNGNs12 | PNGNs15 | N-GNs | Pt/C  |
|---------------|--------|--------|--------|---------|---------|-------|-------|
| Onset         | -0.17  | -0.19  | -0.20  | -0.20   | -0.21   | -0.22 | 0.01  |
| potential (V) |        |        |        |         |         |       |       |
| Current       | -0.16  | -0.18  | -0.19  | -0.18   | -0.15   | -0.14 | -0.27 |
| (mA)          |        |        |        |         |         |       |       |

**Table S4.** Electron transferred numbers (n) of all samples from RDE measurements at different electrode potentials of -0.4 V, -0.5 V and -0.6 V

| <b>Sample</b>   | <b>-0.4 V</b> | <b>-0.5 V</b> | <b>-0.6 V</b> |
|-----------------|---------------|---------------|---------------|
| <b>PN-GNs3</b>  | 3.63          | 3.43          | 3.70          |
| <b>PN-GNs5</b>  | 3.70          | 3.65          | 3.91          |
| <b>PN-GNs6</b>  | 3.64          | 3.55          | 3.84          |
| <b>PN-GNs12</b> | 3.15          | 3.42          | 3.71          |
| <b>PN-GNs15</b> | 2.38          | 3.88          | 3.53          |
| <b>N-GNs</b>    | 3.24          | 3.40          | 3.57          |
| <b>Pt/C</b>     | 4.00          | 3.92          | 3.96          |
